# Supplementary material for: Decoding Genetic Features and Antimicrobial Susceptibility of Pseudomonas aeruginosa Strains Isolated from Bloodstream Infections
Source: MDPI journal article supplement (doi:10.3390/ijms23169208), 2022-08-16
Supplement: s1 [file s1]

# Decoding genetic features and antimicrobial susceptibility of *Pseudomonas aeruginosa* strains isolated from bloodstream infections

Tomasz Bogiel\*, Dagmara Depka, Mateusz Rzepka and Agnieszka Mikucka

Microbiology Department, Ludwik Rydygier Collegium Medicum in Bydgoszcz, Nicolaus Copernicus University in Toruń, 85-094 Bydgoszcz, Poland

\* Correspondence: e-mail: t.bogiel@cm.umk.pl, telephone number: +48 52 585 44 80

**Table S1.** The origin of the *P. aeruginosa* strains included into the study ( $n = 71$ )

| Department/Clinic                                                                      | Number of strains ( $n = 71$ ) | Percentage of strains (%) |
|----------------------------------------------------------------------------------------|--------------------------------|---------------------------|
| Department of Anaesthesiology and Intensive Care                                       | 34                             | 47.9                      |
| Department of Cardiology and Internal Medicine                                         | 14                             | 19.7                      |
| Clinical Unit of Paediatric Anaesthesiology and Intensive Therapy                      | 6                              | 8.5                       |
| Department of Paediatrics, Haematology and Oncology with Bone Marrow Transplant Clinic | 5                              | 7.0                       |
| Department of Liver and General Surgery                                                | 3                              | 4.2                       |
| Department of Geriatrics                                                               | 2                              | 2.8                       |
| Department of Nephrology, Hypertension and Internal Medicine and Dialysis Station      | 2                              | 2.8                       |
| Department of Cardiac Surgery and Intensive Care                                       | 1                              | 1.4                       |
| Department of Transplantation and General Surgery                                      | 1                              | 1.4                       |
| Department of General, Oncologic and Paediatric Urology                                | 1                              | 1.4                       |
| Department of Dermatology, Sexually Transmitted Diseases and Immunodermatology         | 1                              | 1.4                       |
| Department of Neurology                                                                | 1                              | 1.4                       |

**Table S2.** The detailed distribution of genotypes with respect to susceptibility profiles of the *P. aeruginosa* strains included into the study ( $n = 71$ )

| Strain No./characteristic | <i>lasB</i> | <i>pIC H</i> | <i>pIC N</i> | <i>nan2</i> | <i>aprA</i> | <i>phzM</i> | <i>exoU</i> | <i>exoS</i> | <i>nan1</i> | <i>pilA</i> | <i>pilB</i> | Genotype number | Number of strains ( $n = 71$ ) | Percentage of strains (%) | Piperacillin | Ticarcillin/clavulanate | Piperacillin/tazobactam | Ceftazidime | Cefepime | Imipenem | Meropenem | Tobramycin | Amikacin | Ciprofloxacin | Levofloxacin | Colistin |
|---------------------------|-------------|--------------|--------------|-------------|-------------|-------------|-------------|-------------|-------------|-------------|-------------|-----------------|--------------------------------|---------------------------|--------------|-------------------------|-------------------------|-------------|----------|----------|-----------|------------|----------|---------------|--------------|----------|
| P428                      | +           | +            | +            | +           | +           | +           | +           | +           | +           | +           | -           | I               | 2                              | 2.8                       | I            | I                       | I                       | I           | I        | R        | I         | S          | S        | I             | I            | S        |
| P459                      | +           | +            | +            | +           | +           | +           | +           | +           | +           | +           | -           |                 |                                |                           | R            | R                       | I                       | I           | I        | I        | S         | S          | S        | R             | R            | S        |
| P242                      | +           | +            | +            | +           | +           | +           | +           | +           | +           | -           | -           | II              | 2                              | 2.8                       | R            | R                       | R                       | R           | R        | R        | R         | R          | R        | R             | R            | S        |
| P306                      | +           | +            | +            | +           | +           | +           | +           | +           | +           | -           | -           |                 |                                |                           | R            | R                       | R                       | R           | R        | I        | S         | S          | S        | I             | I            | S        |
| P301                      | +           | +            | +            | +           | +           | +           | +           | +           | -           | -           | -           | III             | 4                              | 5.6                       | R            | R                       | R                       | R           | R        | R        | R         | S          | S        | I             | I            | S        |
| P453                      | +           | +            | +            | +           | +           | +           | +           | +           | -           | -           | -           |                 |                                |                           | R            | R                       | R                       | R           | R        | I        | S         | S          | R        | R             | R            | S        |
| P569                      | +           | +            | +            | +           | +           | +           | +           | +           | -           | -           | -           |                 |                                |                           | I            | I                       | I                       | I           | I        | I        | S         | S          | S        | I             | I            | S        |
| P575                      | +           | +            | +            | +           | +           | +           | +           | +           | -           | -           | -           |                 |                                |                           | I            | I                       | I                       | I           | I        | I        | S         | S          | S        | I             | I            | S        |
| P247                      | +           | +            | +            | +           | +           | +           | +           | -           | +           | +           | -           | IV              | 5                              | 7.0                       | I            | I                       | I                       | I           | I        | R        | R         | S          | S        | R             | R            | S        |
| P317                      | +           | +            | +            | +           | +           | +           | +           | -           | +           | +           | -           |                 |                                |                           | I            | I                       | I                       | I           | I        | I        | S         | S          | S        | I             | I            | S        |
| P318                      | +           | +            | +            | +           | +           | +           | +           | -           | +           | +           | -           |                 |                                |                           | R            | R                       | R                       | R           | R        | R        | R         | S          | S        | R             | R            | S        |
| P450                      | +           | +            | +            | +           | +           | +           | +           | -           | +           | +           | -           |                 |                                |                           | I            | I                       | I                       | I           | I        | R        | S         | S          | S        | I             | R            | S        |
| P567                      | +           | +            | +            | +           | +           | +           | +           | -           | +           | +           | -           |                 |                                |                           | I            | R                       | I                       | I           | I        | R        | R         | S          | S        | I             | I            | S        |
| P315                      | +           | +            | +            | +           | +           | +           | +           | -           | +           | -           | -           | V               | 5                              | 7.0                       | R            | R                       | R                       | R           | R        | R        | R         | S          | S        | I             | I            | S        |
| P346                      | +           | +            | +            | +           | +           | +           | +           | -           | +           | -           | -           |                 |                                |                           | I            | R                       | I                       | I           | I        | R        | I         | S          | S        | I             | I            | S        |
| P449                      | +           | +            | +            | +           | +           | +           | +           | -           | +           | -           | -           |                 |                                |                           | R            | R                       | R                       | R           | I        | R        | I         | S          | S        | I             | I            | S        |
| P455                      | +           | +            | +            | +           | +           | +           | +           | -           | +           | -           | -           |                 |                                |                           | R            | R                       | R                       | R           | I        | I        | S         | S          | S        | I             | I            | S        |
| P547                      | +           | +            | +            | +           | +           | +           | +           | -           | +           | -           | -           |                 |                                |                           | R            | I                       | R                       | I           | I        | R        | I         | S          | S        | I             | I            | S        |
| P395                      | +           | +            | +            | +           | +           | +           | +           | -           | -           | +           | +           | VI              | 1                              | 1.4                       | I            | I                       | I                       | I           | I        | I        | S         | S          | S        | I             | I            | S        |
| P175                      | +           | +            | +            | +           | +           | +           | +           | -           | -           | -           | -           |                 |                                |                           | R            | R                       | R                       | R           | R        | R        | R         | R          | R        | R             | R            | S        |
| P245                      | +           | +            | +            | +           | +           | +           | +           | -           | -           | -           | -           | VII             | 10                             | 14.1                      | R            | R                       | R                       | R           | R        | R        | R         | R          | R        | R             | R            | S        |
| P246                      | +           | +            | +            | +           | +           | +           | +           | -           | -           | -           | -           |                 |                                |                           | R            | R                       | I                       | R           | I        | R        | R         | R          | R        | I             | I            | S        |
| P248                      | +           | +            | +            | +           | +           | +           | +           | -           | -           | -           | -           |                 |                                |                           | R            | R                       | R                       | R           | I        | R        | R         | R          | R        | R             | R            | S        |
| P249                      | +           | +            | +            | +           | +           | +           | +           | -           | -           | -           | -           |                 |                                |                           | R            | R                       | R                       | R           | R        | R        | R         | S          | S        | I             | I            | S        |
| P251                      | +           | +            | +            | +           | +           | +           | +           | -           | -           | -           | -           |                 |                                |                           | R            | R                       | R                       | R           | I        | R        | R         | R          | R        | R             | R            | S        |
| P300                      | +           | +            | +            | +           | +           | +           | +           | -           | -           | -           | -           |                 |                                |                           | R            | R                       | R                       | R           | R        | R        | R         | R          | R        | R             | R            | S        |
| P308                      | +           | +            | +            | +           | +           | +           | +           | -           | -           | -           | -           |                 |                                |                           | R            | R                       | R                       | R           | R        | R        | R         | R          | R        | R             | R            | S        |
| P568                      | +           | +            | +            | +           | +           | +           | +           | -           | -           | -           | -           |                 |                                |                           | R            | R                       | R                       | R           | R        | R        | R         | R          | R        | R             | R            | S        |
| P576                      | +           | +            | +            | +           | +           | +           | +           | -           | -           | -           | -           |                 |                                |                           | R            | R                       | R                       | R           | I        | R        | R         | R          | S        | R             | R            | S        |
| P447                      | +           | +            | +            | +           | +           | +           | -           | +           | +           | +           | -           | VIII            | 1                              | 1.4                       | R            | R                       | R                       | R           | R        | I        | S         | S          | S        | I             | I            | S        |
| P170                      | +           | +            | +            | +           | +           | +           | -           | +           | +           | -           | -           |                 |                                |                           | R            | R                       | I                       | I           | I        | I        | S         | S          | R        | R             | R            | S        |
| P171                      | +           | +            | +            | +           | +           | +           | -           | +           | +           | -           | -           | IX              | 13                             | 18.3                      | R            | R                       | R                       | R           | I        | R        | I         | S          | R        | R             | R            | S        |
| P172                      | +           | +            | +            | +           | +           | +           | -           | +           | +           | -           | -           |                 |                                |                           | R            | R                       | I                       | I           | I        | I        | S         | S          | R        | R             | R            | S        |
| P174                      | +           | +            | +            | +           | +           | +           | -           | +           | +           | -           | -           |                 |                                |                           | I            | I                       | I                       | I           | I        | I        | S         | S          | R        | R             | R            | S        |
| P241                      | +           | +            | +            | +           | +           | +           | -           | +           | +           | -           | -           |                 |                                |                           | R            | R                       | R                       | R           | R        | R        | I         | R          | R        | R             | R            | S        |
| P244                      | +           | +            | +            | +           | +           | +           | -           | +           | +           | -           | -           |                 |                                |                           | R            | R                       | R                       | R           | R        | R        | I         | R          | R        | R             | R            | S        |
| P302                      | +           | +            | +            | +           | +           | +           | -           | +           | +           | -           | -           |                 |                                |                           | R            | R                       | R                       | R           | R        | R        | R         | S          | S        | I             | I            | S        |
| P303                      | +           | +            | +            | +           | +           | +           | -           | +           | +           | -           | -           |                 |                                |                           | R            | R                       | R                       | R           | R        | I        | S         | S          | S        | I             | I            | S        |
| P304                      | +           | +            | +            | +           | +           | +           | -           | +           | +           | -           | -           |                 |                                |                           | I            | R                       | I                       | I           | I        | R        | I         | S          | R        | R             | R            | S        |
| P305                      | +           | +            | +            | +           | +           | +           | -           | +           | +           | -           | -           |                 |                                |                           | R            | R                       | R                       | R           | R        | R        | R         | S          | S        | I             | I            | S        |
| P310                      | +           | +            | +            | +           | +           | +           | -           | +           | +           | -           | -           |                 |                                |                           | R            | R                       | R                       | R           | R        | R        | R         | S          | S        | R             | R            | S        |



**Table S3:** The distribution and statistically significant correlation revealed for the selected pairs of genes included into the study

| Gene pairs        | No. (%) of the isolates with a particular gene presence ( <i>n</i> = 71) |           |           |           | <i>r<sub>s</sub></i> |
|-------------------|--------------------------------------------------------------------------|-----------|-----------|-----------|----------------------|
|                   | +/+                                                                      | +/-       | -/+       | -/-       |                      |
| <i>aprA/nan2</i>  | 62 (87.3)                                                                | 4 (5.6)   | 1 (1.4)   | 4 (5.6)   | 0.598298             |
| <i>phzM/nan2</i>  | 54 (76.1)                                                                | 12 (16.9) | 1 (1.4)   | 4 (5.6)   | 0.378558             |
| <i>phzM/aprA</i>  | 52 (73.2)                                                                | 3 (4.2)   | 11 (15.5) | 5 (7.0)   | 0.340855             |
| <i>nan1/phzM</i>  | 31 (43.7)                                                                | 3 (4.2)   | 24 (33.8) | 13 (18.3) | 0.314591             |
| <i>nan1/nan2</i>  | 34 (47.9)                                                                | 0 (0.0)   | 32 (45.1) | 5 (7.0)   | 0.263847             |
| <i>nan1/exoS</i>  | 24 (33.8)                                                                | 10 (14.1) | 17 (23.9) | 20 (28.2) | 0.249212             |
| <i>pilA/pilB</i>  | 2 (2.8)                                                                  | 12 (16.9) | 1 (1.4)   | 56 (78.9) | 0.247847             |
| <i>pilA/nan1</i>  | 10 (14.1)                                                                | 4 (5.6)   | 24 (33.8) | 33 (46.5) | 0.233547             |
| <i>nan1/exoU</i>  | 17 (23.9)                                                                | 17 (23.9) | 27 (38.0) | 10 (14.1) | -0.236401            |
| <i>pilA/plC N</i> | 12 (16.9)                                                                | 2 (2.8)   | 56 (78.9) | 1 (1.4)   | -0.247847            |
| <i>exoS/exoU</i>  | 14 (19.7)                                                                | 27 (38.0) | 30 (42.3) | 0 (0.0)   | -0.670076            |

(+) – presence of a particular gene; (-) – absence of a particular gene; *r<sub>s</sub>* – Spearman's rank correlation coefficient (< 0.2 – none or statistically irrelevant correlation (data not show), 0.2 – 0.4 a weak correlation, 0.4 – 0.7 – a moderate correlation, 0.7 – 0.9 a strong correlation, > 0.9 – a very strong correlation)

**Figures S1-S11.** Pictures of the electrophoretic gels showing the amplicons of PCR for the corresponding genes detected in the present study, with their decreasing frequency; (M - DNA size marker of 100-1.000 or 100-3.000 bp; numbers – names assigned to a particular strain; (+) or K(+) – positive PCR control; (-) or K(-) – negative PCR control

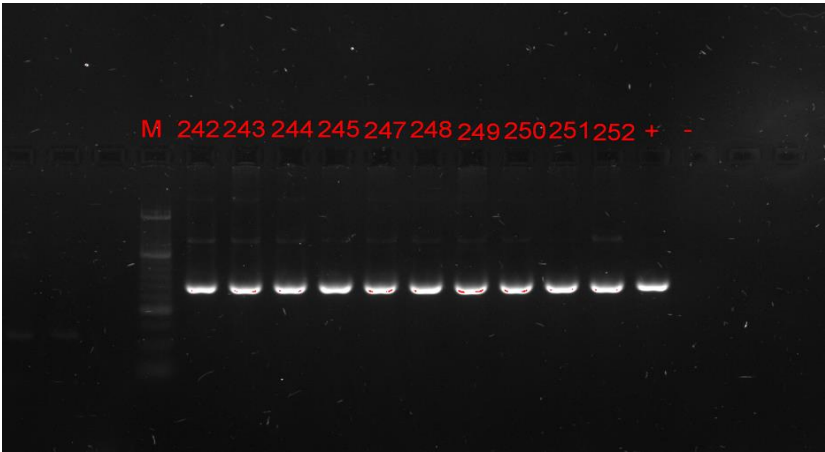

Figure S1 – the *lasB* gene

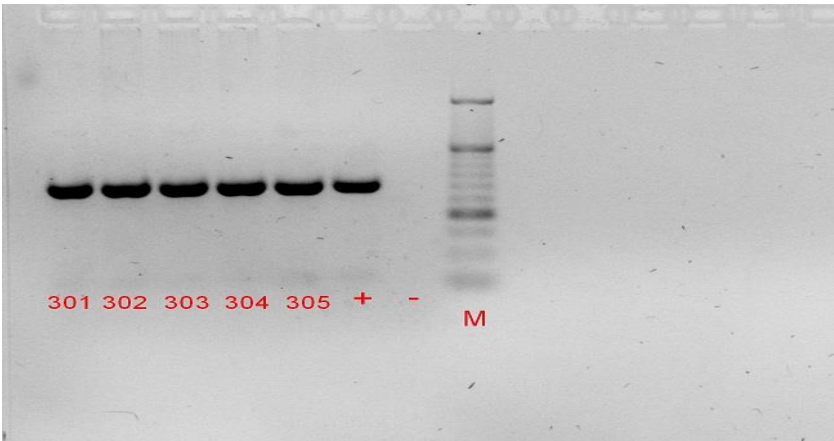

Figure S2 – the *plcH* gene

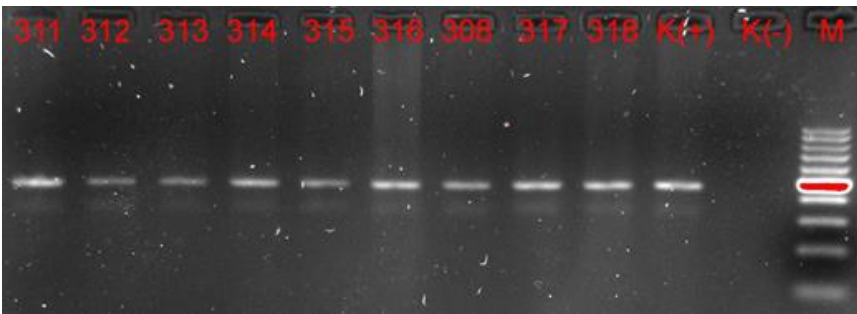

Figure S3 – the *plcN* gene

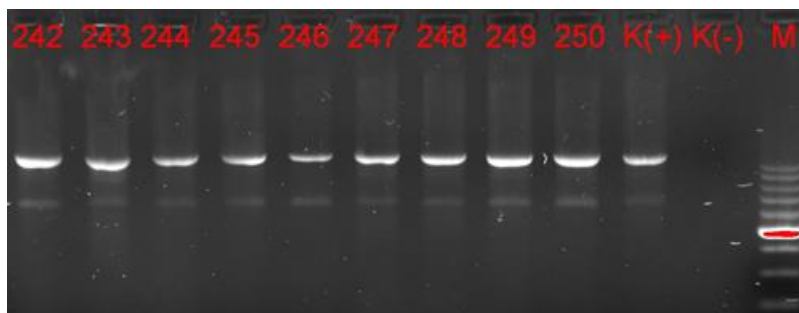

Figure S4 – the *nan2* gene

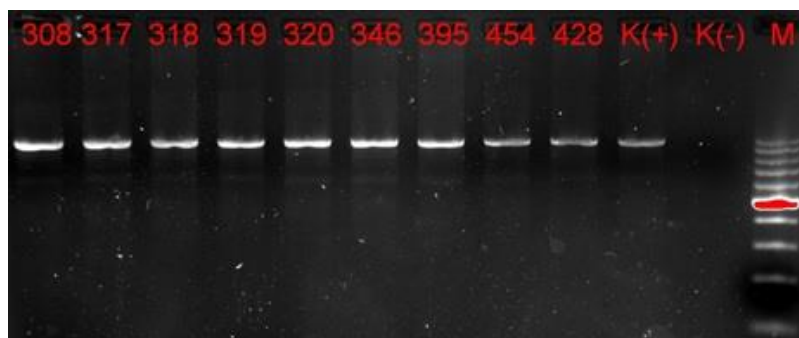

Figure S5 – the *aprA* gene

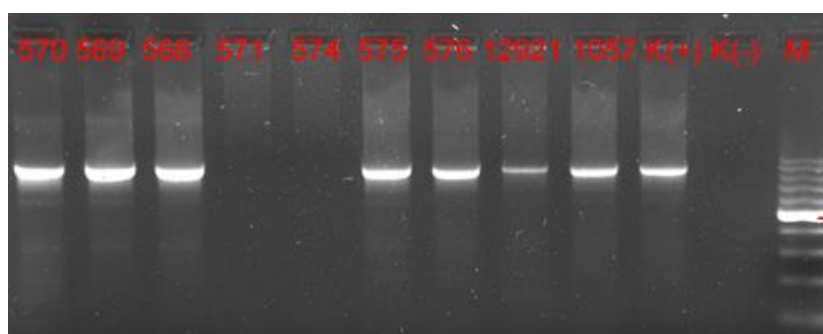

Figure S6 – the *phzM* gene

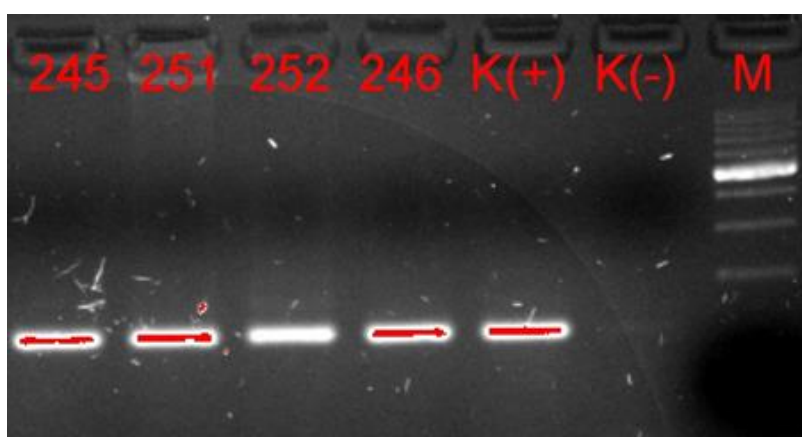

Figure S7 – the *exoU* gene

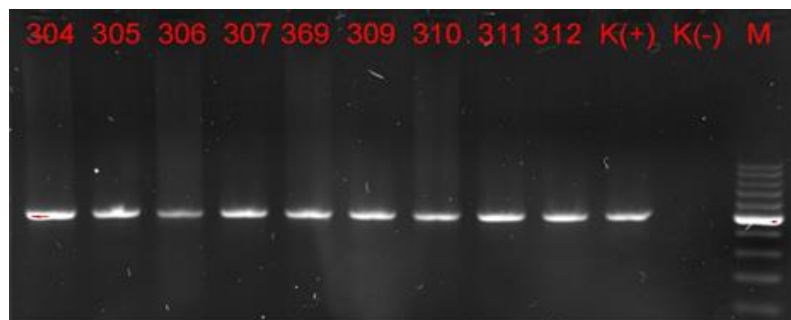

Figure S8 – the *exoS* gene

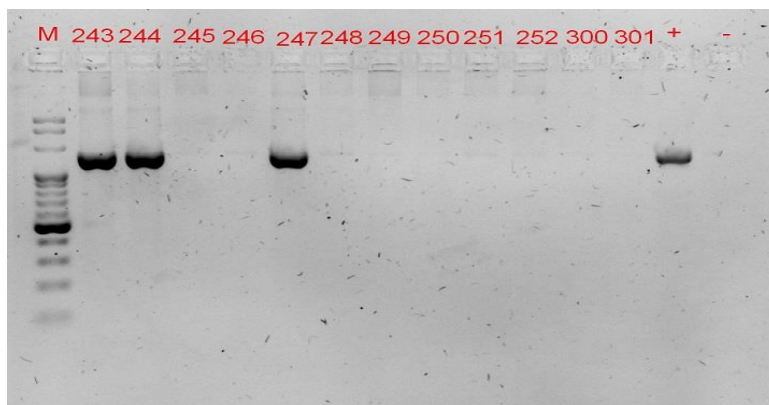

Figure S9 – the *nan1* gene

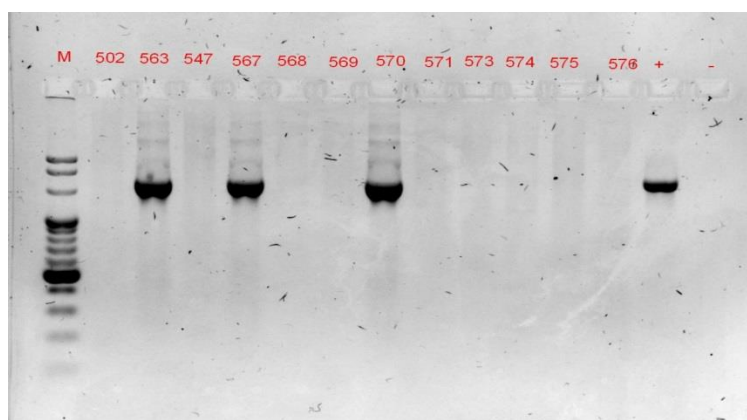

Figure S10 – the *pilA* gene

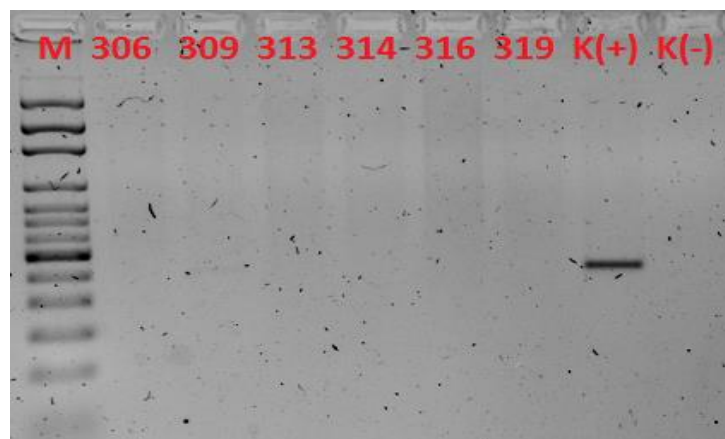

Figure S11 – the *pilB* gene
